# Supplementary material for: Different effects of constitutive and induced microbiota modulation on microglia in a mouse model of Alzheimer’s disease
Source: Springer Nature journal article supplement (doi:10.1186/s40478-020-00988-5), 2020-07-29
Supplement: 40478_2020_988_MOESM3_ESM.pdf [file 40478_2020_988_MOESM3_ESM.pdf]

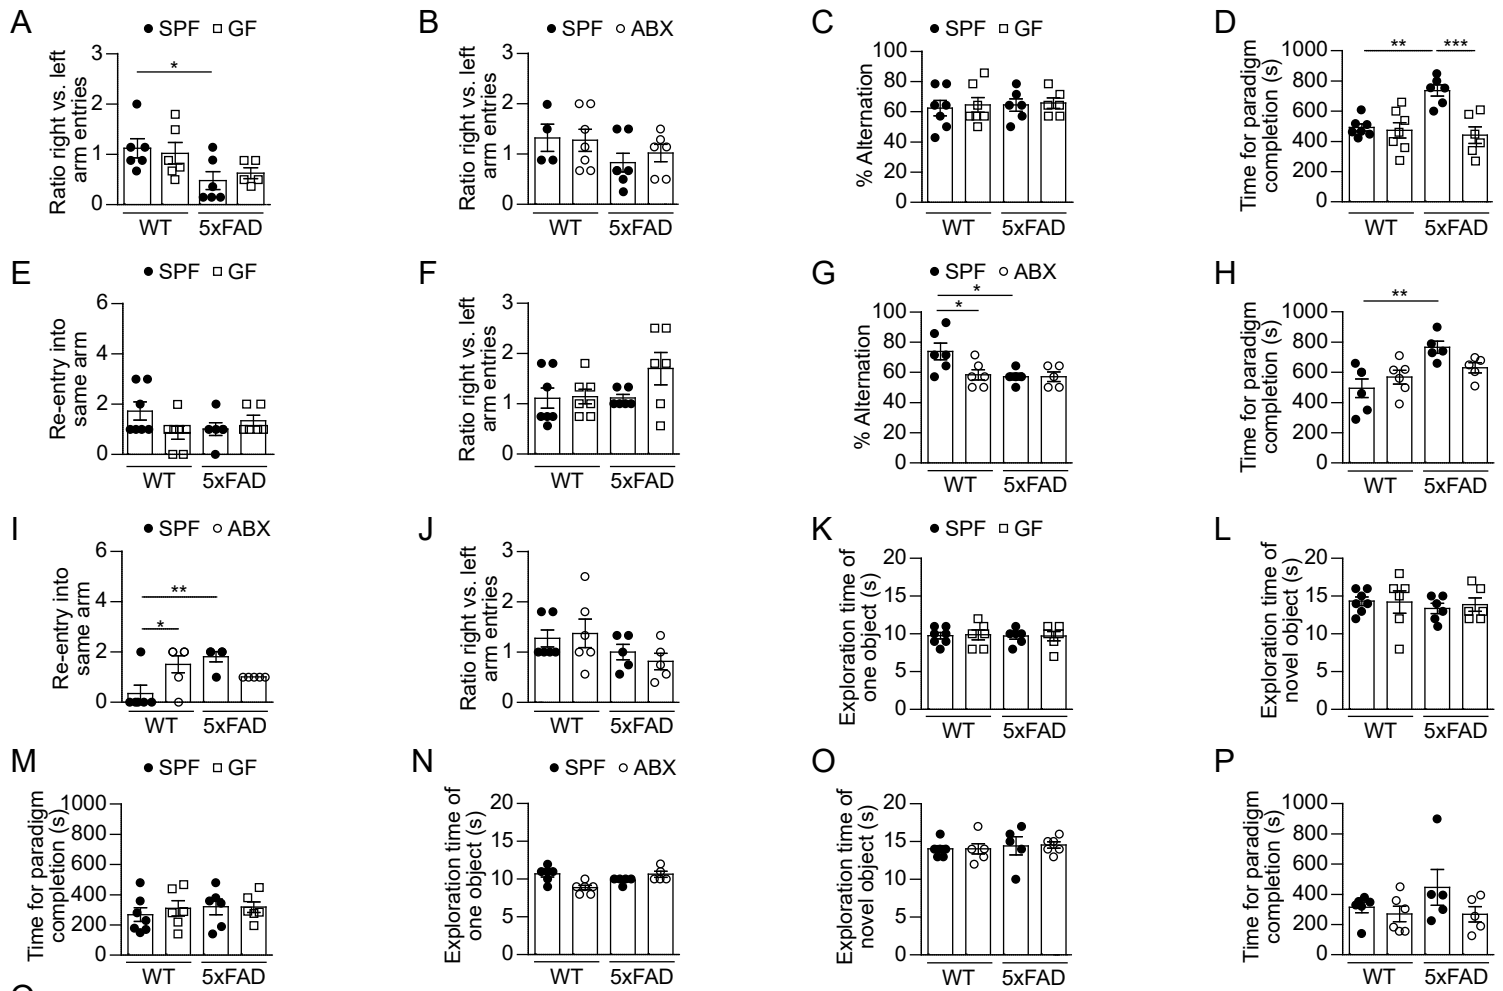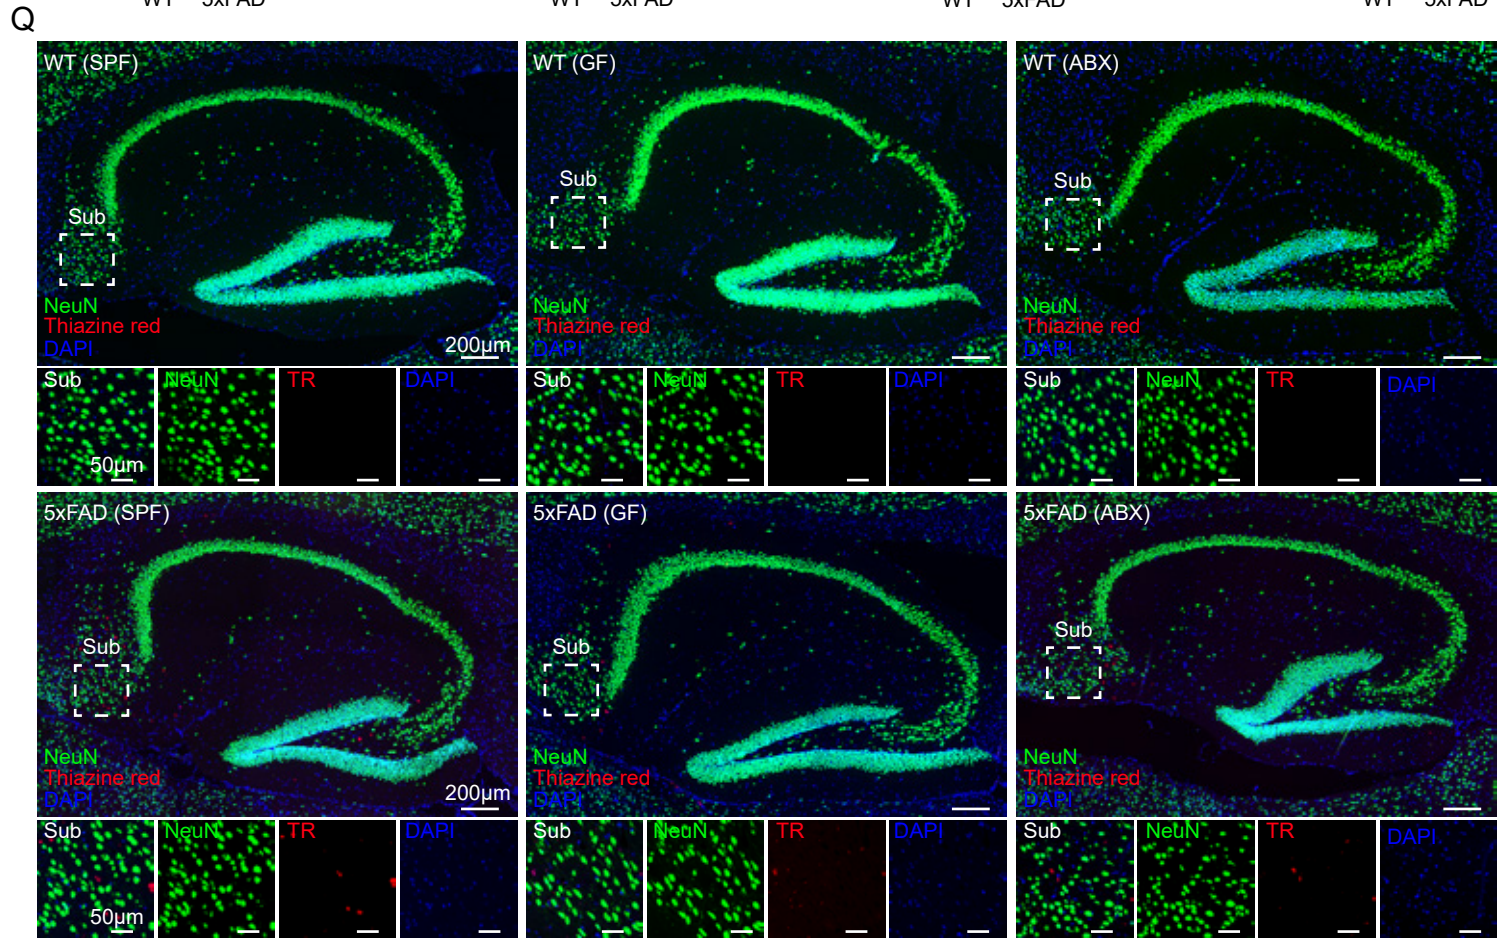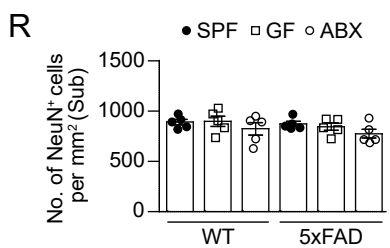

Suppl. Figure 3
