# Supplementary material for: Different effects of constitutive and induced microbiota modulation on microglia in a mouse model of Alzheimer’s disease
Source: Acta Neuropathol Commun. 2020 Jul 29;8:119. doi: 10.1186/s40478-020-00988-5 (PMC7389451; doi:10.1186/s40478-020-00988-5)
Supplement: Supplementary file 6 — Additional file 6. Table 1. Maaslin Analysis Output (H2O Group for Genotype Comparison). [file 40478_2020_988_MOESM6_ESM.xlsx]

## Sheet: Maaslin_H2O-Genotype
Variable	Feature	Value	Coefficient	N	N not 0	P-value	Q-value
Genotype	Bacteria|Firmicutes|Bacilli|Lactobacillales|Enterococcaceae|Other	GenotypeWT	0.00615200894252155	31	21	0.00139688262912731	0.0726378967146204
Genotype	Bacteria|Firmicutes|Erysipelotrichi|Erysipelotrichales|Erysipelotrichaceae_Coprobacillus	GenotypeWT	-0.00495400819636672	31	23	0.0138375433395405	0.359776126828052
Genotype	Bacteria|Firmicutes|Clostridia|Clostridiales|Lachnospiraceae_Coprococcus	GenotypeWT	-0.0220482515159599	31	31	0.0281529401207754	0.479566589048065
Genotype	Bacteria|Firmicutes|Clostridia|Clostridiales|Ruminococcaceae_	GenotypeWT	-0.0485931579823358	31	31	0.0415623770253113	0.479566589048065
Genotype	Bacteria|Firmicutes|Clostridia|Clostridiales|Ruminococcaceae|Other	GenotypeWT	-0.013147760076075	31	31	0.0461121720238524	0.479566589048065
Genotype	Bacteria|Firmicutes|Clostridia|Clostridiales|Ruminococcaceae_Oscillospira	GenotypeWT	-0.0198547555005472	31	31	0.0725279187164223	0.609963601567668
Genotype	Bacteria|Tenericutes|Mollicutes|RF39	GenotypeWT	-0.0200701823579714	31	28	0.0966940090763926	0.609963601567668
Genotype	Bacteria|Deferribacteres	GenotypeWT	0.0121941134103028	31	20	0.10557062334825	0.609963601567668
Genotype	Bacteria|Deferribacteres|Deferribacteres|Deferribacterales|Deferribacteraceae_Mucispirillum	GenotypeWT	0.0121941134103028	31	20	0.10557062334825	0.609963601567668
Genotype	Bacteria|Firmicutes|Clostridia|Clostridiales|Ruminococcaceae_Ruminococcus	GenotypeWT	-0.0151673293531268	31	31	0.131221144129037	0.620955939806538
Genotype	Bacteria|Bacteroidetes|Bacteroidia|Bacteroidales	GenotypeWT	-0.00718372088174161	31	24	0.133608871248184	0.620955939806538
Genotype	Bacteria|Tenericutes	GenotypeWT	-0.0167249387400925	31	29	0.147665767991859	0.620955939806538
Genotype	Bacteria|Firmicutes|Clostridia|Clostridiales|Lachnospiraceae|Other	GenotypeWT	0.00695946195981669	31	31	0.160170493593962	0.620955939806538
Genotype	Bacteria|Firmicutes|Clostridia|Clostridiales|Lachnospiraceae_Dorea	GenotypeWT	0.00282890947578673	31	28	0.167180445332529	0.620955939806538
Genotype	Bacteria|Firmicutes|Clostridia|Clostridiales|Clostridiaceae_Clostridium	GenotypeWT	-0.00461004571826757	31	17	0.200593372577538	0.64063413312867
Genotype	Bacteria|Firmicutes|Clostridia|Clostridiales|Lachnospiraceae_	GenotypeWT	0.0371386967405469	31	31	0.222125282033173	0.64063413312867
Genotype	Bacteria|Bacteroidetes|Bacteroidia|Bacteroidales|Prevotellaceae_	GenotypeWT	0.00349583908329819	31	28	0.227154863546025	0.64063413312867
Genotype	Bacteria|Actinobacteria|Coriobacteriia|Coriobacteriales|Coriobacteriaceae_Collinsella	GenotypeWT	0.00137159682225101	31	16	0.246375128094414	0.64063413312867
Genotype	Bacteria|Firmicutes|Clostridia|Clostridiales|Lachnospiraceae_Blautia	GenotypeWT	0.0034009839641584	31	31	0.246501956198206	0.64063413312867
Genotype	Bacteria|Proteobacteria|Deltaproteobacteria|Desulfovibrionales|Desulfovibrionaceae_Bilophila	GenotypeWT	0.00420803398048125	31	30	0.256618351277178	0.64063413312867
Genotype	Bacteria|Proteobacteria|Betaproteobacteria|Burkholderiales|Alcaligenaceae_Sutterella	GenotypeWT	-0.00892794634759362	31	31	0.267239359008101	0.64063413312867
Genotype	Bacteria|Bacteroidetes|Bacteroidia|Bacteroidales|_Paraprevotellaceae___Prevotella_	GenotypeWT	-0.011431340410718	31	31	0.271037517862129	0.64063413312867
Genotype	Bacteria|Proteobacteria|Alphaproteobacteria|Rickettsiales|mitochondria|Other	GenotypeWT	0.00123013964078526	31	18	0.300104639039192	0.67849744478426
Genotype	Bacteria|Firmicutes|Bacilli|Lactobacillales|Lactobacillaceae_Lactobacillus	GenotypeWT	0.0134101602316927	31	31	0.35585443433587	0.702643058729288
Genotype	Bacteria|Firmicutes|Clostridia|Clostridiales	GenotypeWT	0.0535853308336515	31	31	0.380106667861577	0.702643058729288
Genotype	Bacteria|Firmicutes|Bacilli|Lactobacillales|Enterococcaceae_Enterococcus	GenotypeWT	0.00144016371795285	31	19	0.38795037796814	0.702643058729288
Genotype	Bacteria|Firmicutes|Clostridia|Clostridiales|Peptococcaceae_	GenotypeWT	-0.0023515199729052	31	31	0.394363378802679	0.702643058729288
Genotype	Bacteria|Bacteroidetes|Bacteroidia|Bacteroidales|Other|Other	GenotypeWT	0.00249931355826791	31	29	0.400691222574844	0.702643058729288
Genotype	Bacteria|Firmicutes|Clostridia|Clostridiales|Dehalobacteriaceae_Dehalobacterium	GenotypeWT	0.00323373802630889	31	31	0.406169497494918	0.702643058729288
Genotype	Bacteria|Bacteroidetes|Bacteroidia|Bacteroidales|S24_7	GenotypeWT	-0.0470948477459639	31	31	0.419223531505279	0.702643058729288
Genotype	Bacteria|Bacteroidetes	GenotypeWT	-0.0466677384476326	31	31	0.423681255518955	0.702643058729288
Genotype	Bacteria|Firmicutes	GenotypeWT	0.0451097887186073	31	31	0.432395728448793	0.702643058729288
Genotype	Bacteria|Firmicutes|Clostridia|Clostridiales|_Mogibacteriaceae__	GenotypeWT	-0.00172844863973063	31	31	0.455657650680361	0.718005995011478
Genotype	Bacteria|Bacteroidetes|Bacteroidia|Bacteroidales|Porphyromonadaceae_Parabacteroides	GenotypeWT	0.00717502585961084	31	31	0.502086913585332	0.749083470842413
Genotype	Bacteria|Actinobacteria|Coriobacteriia|Coriobacteriales|Coriobacteriaceae|Other	GenotypeWT	-0.00108322231287104	31	17	0.509833740666383	0.749083470842413
Genotype	Bacteria|Proteobacteria|Epsilonproteobacteria|Campylobacterales|Helicobacteraceae_Flexispira	GenotypeWT	0.00473666499781731	31	27	0.518596249044748	0.749083470842413
Genotype	Bacteria|Bacteroidetes|Bacteroidia|Bacteroidales|Rikenellaceae_	GenotypeWT	0.0104236298797482	31	31	0.53414500265219	0.750690273997672
Genotype	Bacteria|Bacteroidetes|Bacteroidia|Bacteroidales|Prevotellaceae_Prevotella	GenotypeWT	-0.00928400172801975	31	31	0.566379875819415	0.756887571657527
Genotype	Bacteria|Proteobacteria	GenotypeWT	-0.00383155226973764	31	31	0.573887152989653	0.756887571657527
Genotype	Bacteria|Firmicutes|Clostridia|Clostridiales|Lachnospiraceae__Ruminococcus_	GenotypeWT	0.00470973478631928	31	31	0.582221208967329	0.756887571657527
Genotype	Bacteria|Bacteroidetes|Bacteroidia|Bacteroidales|Bacteroidaceae_Bacteroides	GenotypeWT	-0.00916084134806251	31	31	0.608765970426617	0.772027176327574
Genotype	Bacteria|Bacteroidetes|Bacteroidia|Bacteroidales|Porphyromonadaceae_	GenotypeWT	0.000914174788710889	31	19	0.623560411649194	0.772027176327574
Genotype	Bacteria|Actinobacteria	GenotypeWT	0.000960256209233231	31	31	0.655816584606066	0.793080520918964
Genotype	Bacteria|Firmicutes|Clostridia|Clostridiales|Clostridiaceae_Candidatus_Arthromitus	GenotypeWT	-0.000821880251154772	31	23	0.697564063222384	0.824393892899181
Genotype	Bacteria|Firmicutes|Clostridia|Clostridiales|Other|Other	GenotypeWT	0.00112773382475948	31	31	0.737517658544684	0.852242627651634
Genotype	Bacteria|Firmicutes|Clostridia|Clostridiales|Lachnospiraceae_Roseburia	GenotypeWT	0.000927726899810667	31	17	0.859588164790495	0.965737454413521
Genotype	Bacteria|Actinobacteria|Coriobacteriia|Coriobacteriales|Coriobacteriaceae_Adlercreutzia	GenotypeWT	0.000353211107240656	31	30	0.878848607301682	0.965737454413521
Genotype	Bacteria|Proteobacteria|Gammaproteobacteria|Enterobacteriales|Enterobacteriaceae_	GenotypeWT	0.000163424810860553	31	24	0.904224737696969	0.965737454413521
Genotype	Bacteria|Cyanobacteria	GenotypeWT	0.000246704845073405	31	21	0.928593706166847	0.965737454413521
Genotype	Bacteria|Cyanobacteria|Chloroplast|Streptophyta	GenotypeWT	0.000246704845073405	31	21	0.928593706166847	0.965737454413521
Genotype	Bacteria|Proteobacteria|Deltaproteobacteria|Desulfovibrionales|Desulfovibrionaceae_	GenotypeWT	8.01827e+09	31	31	0.991595644026815	0.996147318172506
Genotype	Bacteria|Firmicutes|Erysipelotrichi|Erysipelotrichales|Erysipelotrichaceae_	GenotypeWT	-1.21348e+09	31	26	0.996147318172506	0.996147318172506
