# Supplementary material for: Different effects of constitutive and induced microbiota modulation on microglia in a mouse model of Alzheimer’s disease
Source: Acta Neuropathol Commun. 2020 Jul 29;8:119. doi: 10.1186/s40478-020-00988-5 (PMC7389451; doi:10.1186/s40478-020-00988-5)
Supplement: Supplementary file 7 — Additional file 7. Table 2. Maaslin Analysis Output (ABX Groups for Genotype Comparison). [file 40478_2020_988_MOESM7_ESM.xlsx]

## Sheet: Maaslin_ABX-Genotype
Variable	Feature	Value	Coefficient	N	N not 0	P-value	Q-value
Genotype	Bacteria|Firmicutes|Clostridia|Clostridiales|Ruminococcaceae_Oscillospira	GenotypeWT	-0.022962498498777	25	25	0.00674793410806737	0.107966945729078
Genotype	Bacteria|Bacteroidetes|Bacteroidia|Bacteroidales|Bacteroidaceae_Bacteroides	GenotypeWT	0.0639407426008576	25	25	0.0183616601959222	0.146893281567378
Genotype	Bacteria|Firmicutes|Clostridia|Clostridiales	GenotypeWT	-0.0689028885484933	25	25	0.105713248468933	0.452511273181072
Genotype	Bacteria|Cyanobacteria	GenotypeWT	0.0506876713606735	25	25	0.167781851731998	0.452511273181072
Genotype	Bacteria|Cyanobacteria|Chloroplast|Streptophyta	GenotypeWT	0.0506876713606735	25	25	0.167781851731998	0.452511273181072
Genotype	Bacteria|Proteobacteria	GenotypeWT	0.0253171193097711	25	25	0.176296844723634	0.452511273181072
Genotype	Bacteria|Bacteroidetes|Bacteroidia|Bacteroidales|Porphyromonadaceae_Parabacteroides	GenotypeWT	0.0787087222436544	25	25	0.231302521798685	0.452511273181072
Genotype	Bacteria|Bacteroidetes|Bacteroidia|Bacteroidales|S24_7	GenotypeWT	-0.0501065986231904	25	25	0.24650125037594	0.452511273181072
Genotype	Bacteria|Firmicutes	GenotypeWT	-0.0329965129996099	25	25	0.254537591164353	0.452511273181072
Genotype	Bacteria|Bacteroidetes|Bacteroidia|Bacteroidales|Rikenellaceae_	GenotypeWT	-0.0188297211249791	25	25	0.350271104408614	0.517511594768138
Genotype	Bacteria|Firmicutes|Bacilli|Lactobacillales|Lactobacillaceae_Lactobacillus	GenotypeWT	0.0238107256716001	25	25	0.355789221403095	0.517511594768138
Genotype	Bacteria|Proteobacteria|Alphaproteobacteria|Rickettsiales|mitochondria|Other	GenotypeWT	0.00523270600966259	25	25	0.392928177698685	0.52390423693158
Genotype	Bacteria|Firmicutes|Clostridia|Clostridiales|Ruminococcaceae_	GenotypeWT	-0.0121832926446859	25	25	0.452920935619793	0.557441151532053
Genotype	Bacteria|Bacteroidetes	GenotypeWT	-0.0122605390446739	25	25	0.527809056415039	0.603210350188616
Genotype	Bacteria|Firmicutes|Bacilli|Lactobacillales|Enterococcaceae|Other	GenotypeWT	0.00587787453880712	25	25	0.711706969082434	0.759154100354597
Genotype	Bacteria|Firmicutes|Clostridia|Clostridiales|Lachnospiraceae_	GenotypeWT	-0.00612317507326198	25	25	0.7837188883479	0.7837188883479
