# Supplementary material for: Different effects of constitutive and induced microbiota modulation on microglia in a mouse model of Alzheimer’s disease
Source: Acta Neuropathol Commun. 2020 Jul 29;8:119. doi: 10.1186/s40478-020-00988-5 (PMC7389451; doi:10.1186/s40478-020-00988-5)
Supplement: Supplementary file 8 — Additional file 8. Table 3. Venn-diagram related genes. [file 40478_2020_988_MOESM8_ESM.xlsx]

## Sheet: venn_SPF_GF_ABX_by_FAD
[SPF FAD vs WT]	[GF FAD vs WT]	[ABX FAD vs WT]	[SPF FAD vs WT] and [ABX FAD vs WT]	[GF FAD vs WT] and [ABX FAD vs WT]	[SPF FAD vs WT] and [GF FAD vs WT] and [ABX FAD vs WT]	[SPF FAD vs WT] and [GF FAD vs WT]
Pltp	Atp6v1f	Fcnb	Uba5	Vkorc1	Apoe	Srebf1
Mrc1	Cox6b1	Lcn2	Ide	Ssr4	Clec7a	Zfp950
Vars	Cfl1	S100a8	C4b	Prdx1	Lpl	Cd209c
Ddx24	Sh3bgrl3	Cd177	Tcof1	Slco4a1	Axl	Csmd3
Tapbp	Myl6	Camp	Mgl2	Siglece	Cst7	Slc35e2
Zscan26	Slc25a4	Itgb2l	Clec10a	Kcnj2	Lyz2	Vim
Hnrnph1	Fkbp1a	Chil3	Tmem104	Socs6	Ank	Rp2
Tgfbi	Ifnar2	Hp	Nusap1	Myeov2	Csf1	Ddost
Gm44667	Itga9	S100a9	Cd36	Rab39	Gusb	Pigs
Zkscan3	Hmgn3	Wfdc21	Timd4	Tmem44	Cd52	Zbtb18
Zcchc7	Uqcr11	Lgmn	Dynlt1b	Cmtm6	Ctsd	Cotl1
Chp2	Ndufb9	Ngp	Spic	Fam174a	Lilrb4a	Adap2os
Ncaph2	Uqcrq	Slc12a2	Ms4a7	Sesn1	Grn	Lars2
Amica1	Rack1	Stil	Gm15446	H2-Ob	Psat1	Clec1a
Pip5k1c	Srp14	Atad2	Cbr2	Dnajb14	Ctsz	Gm13479
Mier1	Psmb6	Knstrn	Cd209b	Rps3	Cd9	Hes1
Ccdc109b	Cox8a	Tmem100	Gas6	Crybb1	Chst2	Yod1
Malat1	Ywhah	Siah1a	Pf4	Slc2a5	Nceh1	Psap
Mthfd2	Ogt	Pqlc2	Ankle1	Degs1	Gaa	Adap2
Ergic1	2410015M20Rik	Flt1	Pla2g2d	Adgrg1	Sulf2	Pnisr
Picalm	Zfp740	Thrsp	Cd209g	Rps11	Pld3	Celf2
Cyr61	Srgn	Cast	Iqgap1	Tmem256	Slc38a10	Napsa
Tial1	Bcl2a1b	Ltf	Cd209f	Chst7	Dab2	Gltscr2
Gm44686	Ndufb8	Mmp9	Pydc4	Ndufa2	Lgals3bp	Scoc
Hspbp1	Nme1	Cntn1	Msn	Prelid1	H2-D1	Slc43a3
Adam19	Gabarap	Tnfaip8l2	Fcna	Rbmx	Cd68	Zfc3h1
Hsd17b11	Cox7a2	Btg2	2610507B11Rik	Grap	Ctsa	Tcf7l2
Ccl8	Atp5j	Sox7	St5	BC028528	Man2b1	Capzb
Nbea	Dbi	Klf6	Sidt2	Uqcr10	Scpep1	Rsrc2
Tmem109	Smim14	Fam101b	1700112E06Rik	Ms4a6b	Pkm	Nlrp1b
Foxred2	Atp5d	Pglyrp1	Cd163	Gpd1	Cd63	Sppl2a
Ccr2	Stab1	Sv2b	Hmmr	Il7r	Ctsb	Tia1
Stx6	Afap1l1	Pnrc1	Lyve1	Fgd2	Dpp7	Tmem202
Mthfr	Akna	Gpr137c	Nuf2	Nudt4	Cadm1	Ivns1abp
Kctd12	Trappc2l	Fam134a	Folr2	Tuba4a	Atp1a3	Chst12
Ms4a4a	Pla2g4b	A430110C17Rik	1010001B22Rik	Gstm5	Myo1e	Bscl2
Gm15564	Nop10	Pogk	Cdca3	Kcnip3	Gnas	Zeb2
Dctn1	Ndufa7	Phospho2	Mcm5	Uqcrh	Srebf2	Ptpn6
Ear2	Rab7	Myd88	F13a1	Rps3a1	Scarb1	Snta1
Dleu2	Slc25a45	Xpo1	1810026B05Rik	Plxdc2	Aplp2	March7
Wdr6	Snrpb	Daam1	Znfx1	Il16	Hexa	Arglu1
Slc25a10	Ndufb7	Ap3d1	Mroh1	Fcer1g	Fam20c	Ube2l6
Qk	Tmem147	Mrpl1	Bmp2k	Rpl37a	Ccl6	Rock2
Cklf	Naa20	Trmt10c	Cdca8	Cx3cr1	Naglu	Rpl10a
Tra2b	Ap1s1	Man1b1	Myo1c	Mapk14	Itgax	Igsf8
Melk	Abhd15	Iars2	Top2a	Tomm7	Timp2	Sdha
Xiap	Atp5e	Als2	Rras2	Ly6e	Ctsl	Yif1b
Tnrc6a	Lamtor1	Dnttip2	Snx8	Cass4	Anxa5	Abhd4
Cdt1	Bcap31	Gm14032	H2-Eb1	Nfkb1	Capg	Ehd4
Taok1	Gng5	Gm26461	Casc5	Rps20	Lrpap1	Srsf1
Med13	Mgst3	Pcdhb19	Plbd1	Asb2	Spp1	Klhl9
Gsk3b	Scarb2	Copa	H2-Aa	Ctla2b	Plek	Coq7
Klra2	Msl2	Slc25a11	Actn4	Gna15	Aldh2	Tardbp
Fcgrt	Mpp1	Mcf2l	Cd38	Tpst2	Ccl3	1600014C10Rik
Fam110b	Pid1	Armc3	Mcm7	Tagln2	St14	Cdc42ep1
Tra2a	Acvr2b	2810417H13Rik	H2afx	Numb	Plaur	Pes1
Zfand6	2210013O21Rik	Ncf4	Pbk	Rpl26	Cybb	Ogdh
Adgre5	Ndufb2	Brs3	Adam8	Dstn	Lgi2	Cd14
Setd1b	Txn1	AI504432	Kras	Tyms	Siglecf	Gem
Slc41a3	Anxa3	Kcna3	Sgpl1	Ggt5	Rell1	Cd33
Ifi203	Svbp	Cltc	Cyp4f18	Eif3f	Pdcd1	Cd164
Atp13a1	Rgl1	Gm13456	Gna12	Rpl39	Itgb2	Gipc1
Sirpb1a	Alkbh2	Coq5	Abca2	Rpl23	Fcrl1	Bcl2l1
Mdm4	Nudt19	Gm5900	Lrrk2	Crem	H2-K1	Gm17705
Gabbr1	2010107E04Rik	Rttn	Ankrd13a	Camk2d	Tsc22d1	Bmt2
Pmepa1	Arpc2	Alpk1	Traip	Pygl	Cd83	Kdm3b
Sfpq	Klhl23	Slbp	Ssbp2	Idh2	Fxyd5	Cdk4
Ube2b	Stx7	D430018E03Rik	Myo9b	Eng	Sdc3	Padi2
Pan3	Hjurp	Man2a1	Mcm3	Rps6ka1	Crip1	Strada
Tln1	Frmd4a	Flot1	Flot2	mt-Cytb	Baiap2l2	Naga
Kcnn4	Lamtor4	Capza2	Rap1b	Rasgrp4	Cd74	Atp5b
Olfm1	Dad1	H2-Ke6	Cbr3	Akr7a5	Coro1c	Nrip1
Tmem181bps	Pomp	Ube2e3	Mtss1	Sash3	Fchsd2	Aldh18a1
Camk2b	Ddx5	Pdyn	Xdh	Tnfrsf1b	Npc2	Rbm5
Actb	Il10ra	Gid8	Plxnc1	Gimap1	Lamp1	Plxna4
Jak3	Atp5o	Elovl2	Myof	Fam46c	Slamf9	Ift57
Alas1	Ttc14	Tpcn2	Mcemp1	Grina	Tmem163	Banf1
1810011H11Rik	Arhgap4	Tubb2a	Gpr22	Zfp704	Hif1a	Khdrbs3
Rala	Hint1	Rbfa	Il2rg	Gbp7	Wfdc17	Chsy1
Cd81	Ifi27	Pign	5330438D12Rik	Stambpl1	Cox6a2	Slc29a3
Sema4a	Kynu	Atf4	Hpgd	Kcnd1	Dgkz	Sirt2
Fam65b	mt-Rnr2	Zfyve19	Cant1	Bin2	Actr3b	Gprasp2
Tyk2	Myl12a	Hgf	Uhrf1	Il6ra	Cd300lf	Kif2c
Adamtsl5	Nedd8	Gpr183	Msr1	Pabpc1	Ftl1	Sardh
Rab11a	Dock8	Pcbp1	Nlrc5	Clta	Crlf2	Epb41l2
Rgs18	Zfp367	Lrr1	Dact1	Rps21	Trf	Nlrp1c-ps
Apbb1ip	Minos1	Npc1l1	Kif18b	Slc15a3	Clic4	Ctsh
Jrkl	Psme2	Aspm	Kif22	Usp21	Tln2	Vezf1
Rhbdf2	Lrrc3	Dbf4	Anxa1	Smad1	Etl4	Tgfbr1
Coro1b	Sh3bp5	Hexb	App	Snx6	Ptchd1	Cnn3
Ap5z1	Pfdn5	Cgrrf1	Ppp2cb	Rps24	Gsto1	Gpr155
Atf6b	Map3k3	Vrk1	Gm3164	Rnf145	Mif	Cysltr1
Rnf138	Romo1	Plekhf2	Anapc5	Rplp2	Cd72	Hps4
Tlr8	Rpl35	Gt(ROSA)26Sor	Incenp	Nfam1	Adssl1	Lgals1
Plxdc1	Ndufs6	Dlgap5	Ccnb1	mt-Rnr1	Mfge8	Irf8
Dpysl2	Dusp3	Gm4070	Prc1	Chst11	Csf3r	Ptrhd1
Trpv4	Hist1h2bc	Pigx	Afm	Herpud1	Ephx1	Zc3h8
Wdhd1	Mrps21	Ypel5	Ncapg2	Rps18	Cd22	Pmaip1
Snd1	Adrbk1	Arhgdib	Rn7sk	Rps25	Mfsd12	Mt2
Gm45222	Tfcp2	Pqlc3	Dok2	mt-Nd1	Got1	Man2c1
9430034N14Rik	Gm12258	Cd276	Bub1b	Plod1	Gpx3	Fuom
Pla2g7	Cox7b	Armc7	Gm44250	Eef1b2	Klhl6	Eif5a
Serpinb8	Atp6v1e1	Spns2	Ifitm6	Cox6c	Creg1	Pten
Gm2956	Tmem176a	Cript	Cenpf	Irgm2	Ifi27l2a	Arpc5
F630028O10Rik	Slc39a4	Rpp38	Emilin2	Nrm	Mical1	Ralgps2
Clasp2	Inpp4b	Pex2	Thbs1	Ctc1	Gltp	C1qc
Tmem33	Smdt1	Ckb	Gm38335	Ncf1	Fgl2	Gnl1
Rn18s-rs5	Map1lc3a	Manba	Tmem82	Klf7	Slc2a6	Trappc6a
Clec4n	Psmg4	Hip1	Zfp420	Trim36	Sdf4	Gprasp1
Mfsd11	Bola3	Ttc3	Aoah	Sri	Apbb2	Psmb8
Ralyl	Bcl2a1a	Cd24a	Phlda3	Hck	Slc44a1	G6pdx
Zfp691	Ndufv3	Gm15523	Pafah1b1	Rps26	Gm2a	Cks1b
Keap1	Eif4ebp1	Cdk6	Gbp6	Ttyh2	Marcks	Nhp2
Hnrnpa2b1	Rad9b	Trak1	Zbtb38	Anapc13	Eno1	Dgat2
Lcp1	P2rx7	Arhgef5	Cnr2	I830077J02Rik	Fuca1	Sh3bgr
L1cam	Calm1	Golga3	Mxd3	Casp8	Syngr1	Dctn4
Atad3a	Sik2	Rgs11	Ncapd2	Slco2b1	Slc11a1	Bclaf1
Ciita	Abtb1	Nuak2	Cd28	Igsf23	Ifitm2	Acvr1
Zmym5	Abl1	Tspan17	St6gal1	Pkib	Gm1673	Gm10269
Tspan33	Atp5c1	Acot11	Slfn2	Cltb	Adap1	Adam33
Cd209d	Gfm2	Ssx2ip	Pitrm1	mt-Nd6	Mamdc2	Got2
Dock2	Tmem9b	Clp1	Fam21	Cck	H2-Ab1	Zfp850
Fkbp5	Tmem176b	Cenpi	Cdc20	Rpl37rt	Acaca	Fcgr3
Plxnb2	Filip1l	4933439K11Rik	Prkch	Ms4a6d	Mt1	Arhgef2
Cd300ld	Tmem14c	Caprin1	Ktn1	Ampd3	Gsn	Gsdmd
Tor3a	6030458C11Rik	Lrp11	Cxcl13	Fez2	B4galnt1	Actr1b
Gnai2	Rps27l	Zkscan14	Brip1	mt-Nd5	Il3ra	Tjp1
Aars	Zfp62	Abt1	Cdca5	Tmem229b	Gns	Rxrg
Zeb1	Pnn	Rpl9	Kif4	Mfap3	Lamp2	Plin3
Emb	Tmbim4	Cradd	F830016B08Rik	Klhl36	Slamf7	Rnaseh2b
Sirpb1c	Ubl5	Hectd2	Mki67	Zfp710	Birc5	Mlf2
Arhgef39	Snx3	Ech1	Cdkn1a	Zfyve21	Anxa2	Smim3
Reep3	Cep170	Cryba4	Srp9	Cebpd	Gcnt2	Sdcbp
Asns	Adamtsl2	Irf5	Fcrls	Arl11	Tnfsf8	Edc4
Cenpm	Dhrs3	Rnase6	Gm4955	Adora3	Serpine2	Map3k5
Rap1a	Mrfap1	Gm24616	Alcam	mt-Tq	Dpys	Nudc
Cfp	Pet100	Nfu1	Armc2	Sh2b3	Ccl4	Arl6ip1
Ubn2	Kxd1	Snw1	Zc3h12d	Slc5a10	Fbn2	Rbms1
Eif3b	Ubxn1	Tifa	Ttk	Acp2	H2-DMa	Txn2
Rchy1	Adcy8	Fnip2	Rgs10	Gm3511	AI506816	Wdr44
Bptf	Slc25a5	Gm10369	Paxip1	Gm7694	Adipor1	3222401L13Rik
Arih1	Tet1	Cdk2ap2	Clec12a	Zbtb7a	Dhx32	Amz1
Vps18	Timm13	Slc35e1	Efcab14	Prkab1	Nucb1	Arid4a
BC005561	Trim26	Asb8	F11r	Cxxc5	Myo1f	Ankrd34b
Lmf2	Fundc2	Fam89a	Pum3	mt-Co1	C3ar1	Tecr
Ube2d1	Lrig3	Izumo1	Chac2	Camkk1	Tpp1	Edem2
Smim20	Sars	Gm6341	Abcb1b	Sfi1	Tubb6	Prpf38b
Nagpa	Nav3	Med4	Kctd6	Ppcdc	Colec12	Zc3h7a
Hps1	Acsl1	Slc8a2	Lefty1	1810011O10Rik	Ldlr	Zfp260
Cd300lg	Tbc1d2b	Dact3	Iigp1	Kcnk12	Sdf2l1	Gng2
B4galt1	Kbtbd2	Tm9sf2	Dusp8	Rpl37	Plbd2	Pdzk1ip1
Ip6k2	Tceb2	Asb11	Dock6	Ythdf2	Aldoa	Pld1
Fam73b	Tspan5	Ubash3b	4930427A07Rik	Pomk	Slc25a37	Rptor
Cmip	Anapc11	Esco2	Emc1	Adtrp	Hpse	Efhd2
Atp8b4	Fam193b	Vapa	Pik3ip1	Eif4b	Ch25h	Usf2
Rhoq	Gpx4	Cd69	Scn1b	Gm9843	Cxcl16	Pak1
Bach1	Swi5	Gm22701	Mis18bp1	Eef1g	Os9	Gucd1
Ccnd2	Tigd2	Slc17a5	Clspn	Rpl21	Trem2	Hlx
1810013L24Rik	Mea1	Fcf1	Nnt	Ier3	Tyrobp	Rbbp9
Msl3l2	Mum1	Arf6	Kif23	Dido1	Plekhb2	Rnaset2a
Wwc1	Rpl7	Plekho1	Ifit3	Gm15503	Ccnb2	Lifr
Hnrnpdl	Snrpd2	Grik4	Ccnh	Nfkbie	Tcn2	Il18rap
Gm29438	Mien1	Il1rl1	Susd6	Mxd1	Prdx4	Igsf9
Itpripl1	Mgat1	Utp3	Pkmyt1	Gk	Milr1	Btbd3
Fcho2	Fam98a	Man2a2	Smc2	Lpcat3	Igf1	Man1a
Hnrnpul2	Arhgef40	Lekr1	Rbm8a	Chst3	Ramp1	Lactb2
Snap91	Slc25a13	Safb2	Snrpb2	Gm2000	Glb1	Mdh2
Stx4a	Acot13	Gm38365	Fam8a1	Pecam1	Tmem154	Layn
Fip1l1	Arpc5l	4632415L05Rik	Ptgds	Smpdl3a	Rpn2	Sema4b
Hpn	Dmwd	Lpcat1	9430076C15Rik	Ppfibp2	Fam189a2	Isg15
Xpr1	Ralgps1	Espl1	Lgals3	Ydjc	Rab7b	Rapgef6
Lrp10	Tmsb4x	Creb3l2	Lilr4b	Rnasel	Tkt	Cbll1
Tnip3	Git2	RP24-230C18.3	Cdca2	Rpl34	Ldha	Idh3a
Hm629797	Frmd4b	Pdxk-ps	2610001J05Rik	Sgsh	Bst2	Myc
Arfgef1	Procr	March8	Cped1	Gm6977	Sorl1	Arhgdia
Actr2	Cyp4f13	Crtap	Tgoln1	C530043K16Rik	Gpr65	Anxa4
Jam3	Gngt2	Cops3	Klrb1c	Tex264	Cpd	RP23-359B23.11
Flna	Epn2	Gsap	Cit	Selplg	Gba	Gpr165
Acox3	Ssbp3	Kcnk13	Dtl	Rnf149	Bhlhe40	Gga2
Lilra5	Ndufa3	Pdhx	Aurka	Abi3bp	Gas7	Arl15
Ppm1e	Atp5j2	Gm20379	Rab35	Ppp2r1b	Mpeg1	Wnk1
Tspan4	Vps29	Ccdc115	Cib1	Unc13b	Gas2l3	Nme2
Klrd1	Xrcc5	Lrpprc	Nxpe1-ps	Slc25a3	Tpi1	Uqcrc1
Cnot2	Arl8a	Nf2	Gm20429	Lpcat2	Trpm1	Elmo1
Scai	Ybx1	Tbcd	Gnpda2	Klhl18	Pacsin1	Dap
Cd93	Ccrl2	Mras	Cd9-ps	H2-T22	Olfr110	Galk1
Wdr26	Cep78	3110056K07Rik	Gm15155	Slc7a8	Prr5l	Stx16
Slc14a1	P2rx1	Sertad1	Pura	Caskin2	Myo5a	Rapgef5
Sirpb1b	Mrpl13	Cxcl9	Ccne1	Arap2	Uap1l1	Impdh1
Dhx34	Psmb1	Trib1	Slc27a1	Fgf2	Man2b2	Cflar
Ccnt2	Psma7	Krcc1	Il1r1	Olfml2b	P2rx4	Vstm4
Rab24	Gm17018	Cdkn1c	C3	Commd9	Gm26902	Dnajb9
Wdr1	Scamp5	Trim37	Mplkip	Gpr162	Stmn1	Klc4
Lrrc8d	Cuta	Naip6	Gm6560	Hfe	Lrba	Ubb
Swt1	Shfm1	Gm26533	Mmp12	Fyn	Atp6v1a	1110008F13Rik
Nsf	Ctsw	Mfsd4b5	Fam35a	Oma1	Rassf3	Tmem170b
Aldh5a1	Itgam	Rrm1	Stat2	Ophn1	Gpr34	Agps
Dnaja2	Ets1	Phf21a	Rn7s6	Etv1	Chd9	Slc7a1
Flcn	Ndufa11	2810002D19Rik	Mcm10	Zfp36l2	Bag1	Atp6v1g1
Cdc25c	Nrep	Fosl2	Vps13c	D8Ertd738e	Klrb1b	Pxk
Iqgap2	Scamp2	Ermap	Gm15989	Hsd17b12	Ncstn	Thra
Cdc73	Mmp11	Snord72	Cchcr1	Ubc	Ucp2	Apc
Pdlim5	Ormdl2	Ssu72	1190002N15Rik	Rsrp1	Fxyd6	Lipa
Rps6ka2	Zfp69	Rbm18	Zfp52	Adarb1	Ifitm3	Iqgap3
Med21	Arf5	Gm22567	Pcyt1a	Zfp637	Dhcr7	Plcd3
Lrrc8a	Slc1a3	Tnks2	Slc25a24	Mycl	Asb10	Map4k1
Rbm25	Sh3bp5l	Kcnq3	Trmt13	Gp9	Fabp5	Tom1l1
Rnf123	Fndc4	Dnajc9	Itsn1	Ptpn1	Egln3	Nfia
Srsf11	Commd4	Ranbp6	Mcm6	Klf10	Ifi204	Pwwp2b
Bmpr2	Dusp5	Batf3	Dnajc10	Pdk1	Spc24	March3
Kctd10	Naa38	Trpm6	Zfp467	Mocos	Tpd52	Thumpd2
Flt3	C1rl	Gm4332	Rad51	Rab3il1	Fth1	Cdh23
Arap1	Znrf1	A430033K04Rik	Cd4	Selm	Napa	Chchd10
Ykt6	Card6	Gm5723	Wscd1	Lockd	Ccna2	Akap9
Ostm1	Ran	1110019D14Rik	Zfp772	Gm10384	Soat1	Cyb5r1
Pik3r1	1500011K16Rik	Fam58b	Tceal1	Sall2	Rnf19b	Baiap2
Crebrf	Zfp871	Casp6	N4bp2l2	Sec16b	Tacc3	Zfp605
Map3k2	Tcp11l2	Parl	Acap1	Snrnp25	P2ry12	Cuedc2
Evi5	Firre	Gtf2h3	Ppp1r1b	Zfp830	Atp1b3	Ncbp3
Paip1	Rps15a	Syne1	Idua	Apobec2	Rrm2	Mdc1
Ccdc157	Uqcc2	Fgd4	E2f8	Rnf128	Nbl1	Tbc1d1
Ppp2r5e	Mospd2	Twf2	Adar	Gm8995	Ckap2l	Gm15726
Gatad2b	Gpatch2l	Mrpl46	Clint1	Rbm41	Pea15a	Litaf
Gm8093	Fbxo6	Elk4	Gm13822	Sla	Akirin2	Mybl2
Mvb12b	Limk2	Gid4	Gm29340	Fam76b	Pfkl	Hnrnph3
Nr1h2	Pknox1	Orai2	Dek	Zfp110	Cox4i1	Elp5
Mndal	Atp6v0a2	Alkbh4	Cspg4	Cd84	Slc25a39	Dtnbp1
Slc38a7	B230354K17Rik	Zdhhc1	Prox2	Pld4	Atp1a1	Cenpw
Crim1	Zfp397	Zfp618	Strn	mt-Nd4	Rai14	B4galt4
Ahnak	Sppl3	Olfm4	Lfng	Olfr111	Gtf2h2	Ten1
Me2	Gm43305	Gm5177	Nup205	Pisd	Hacd2	Eef2k
Rap1gds1	Zbtb20	Chtf18	Ablim1	Vegfb	P3h3	Pabpn1
Clec4b1	1700017B05Rik	Tmem131	Slc44a2	Matk	Rplp0	Cd48
Zbtb26	Ptgs1	Bcl10	Ccz1	Zswim6	Cdk18	Vat1
Tap2	B3gnt7	5031425E22Rik	Il1rn	Gm20721	Sil1	Rrp1
Vamp4	Sipa1l1	Trit1	Serpinb1a	Mapkapk3	Fcgr2b	Atat1
Rbck1	Hprt	Btbd19	Klk8	Pde4b	Ly9	Syk
Gm16213	Cln5	Rab32	Glg1	Mterf4	Atxn10	Tctn1
Rab31	Rpl13a	2610035D17Rik	Was	Mfsd13a	Lyz1	Parp3
Nek2	Pilra	Vps8	Exo1	Cdkn2aip	Scimp	Aes
Gcn1l1	Cstf2t	Lpp	Runx3	Usp2	Ccr5	Pofut2
Cyfip1	4632427E13Rik	Mmp14	RP24-286J21.7	Bcl2a1c	Fabp3	Map1lc3b
Hmgxb3	Cnpy2	Klhl7	Sestd1	Tmem120b	Dgkd	Pcmtd2
Prep	Wbp2	Trim14	Zfhx4	Slc12a3	Oas1a	Agpat4
Scap	Ndufb6	Etv5	Rad54l	Zfp623	2900026A02Rik	Ranbp1
Kat6a	2810428I15Rik	Tmpo	Lix1	Gcat	Ptger4	Clk1
Fam102b	Psd2	Arrdc1	Btaf1	Lamb2	Cmtm8	Pdk3
Slc2a8	2500004C02Rik	Ddah2	Prorsd1	Fam212a	Calm2	Inpp5d
Hk2	Nlrc3	Siglecg	Helz2	Myo1g	Oasl2	Chuk
Fbxw2	Hsd17b10	Zdhhc3	Ifi205	RP23-235I2.1	Mcm2	Med28
Micu3	Csrnp2	RP23-179K7.3	Atp2a1	Trim35	Atp6v1b2	Kdm7a
Smarca4	Rpl29	4833403J16Rik	Myl2	Tbxas1	Adora1	Mgea5
Ly96	Tma7	C1s2	2700062C07Rik	Lipo3	BC035044	Hmha1
Ccar2	Dock4	Noc2l	Anln	Rpl22	Gm13391	Zfp322a
Tpst1	Coa3	D630029K05Rik	Hipk1	Chst8	Sp100	Bcl2a1d
Il11ra1	Cetn2	Iscu	Npsr1	Tob2	Tgfbr2	Ifngr2
A830080D01Rik	Slc43a2	Bet1l	Ints7	Mydgf	Jup	Snrnp70
Stra6l	1600002K03Rik	Gmnn		Cd1d1	Echs1	Get4
Rbm27	Acaa2	Ndufaf7		Gm15513	Cd274	Arhgef6
Abi1	Gm5617	Mtfr1		Asph	Csf2ra	Luc7l3
Gart	Mapkapk2	Btg1		Slfn5	Cxcl14	Gm20605
BC030336	Creb3l1	Lmnb1		Cggbp1	H2-Q7	Arid1a
Arid4b	Rtn4rl1	Gclc		Acy1	Tpm4	Ing1
Gramd3	Gpd2	Aig1		Hsp90b1	Lsp1	Nos1ap
Hpgds	Adi1	Inip		Zfp235	Atf3	Sft2d2
Mfsd10	Hmgcs1	Coro1a		Dpy19l4	Tecpr1	Snph
Ace	Otud1	Gm26947		Ncaph	Gm43351	Tmem97
Mypopos	Tbccd1	Gdf9		Megf9	Bcar3	Rgs7bp
Atp6v0a1	Hscb	Hmox2		1700003F12Rik	Rgs2	Zfp800
Ssrp1	Slc16a6	Ankrd55		Eef1d	Eef2	Rabac1
Brwd3	Gab3	Coq10b		Mettl21a	Clcn7	Rbm12b2
Rel	Cox5b	Dock11		Dnajc28	Pianp	Mrpl28
Zfp119b	Fam162a	Marcksl1		Nexn	Egr2	Ier2
Fpr1	Guk1	Mmadhc		Acp5	Gpi1	Med12l
Mcl1	Trim16	Klhl24		1500017E21Rik	Ube2c	Pgm2
Naif1	Timm8b	Mad2l1bp		Chst10	Maff	Tmem106c
Osbpl2	Cmya5	Fstl4		Cfh	Tcf19	Xab2
Tmco4	Edf1	Abi2		Phyhd1	Oas1g	Zdhhc8
Dpep2	Cep55	Gm14139		Coa5	Cd244	Cask
Aatk	Ndufb11	Diaph3		Stx3	Ecscr	Gm26981
Ptpn2	Msh2	RP23-423B21.6		Rnf180	Ergic3	Naa16
Sfxn5	E4f1	Nupr1		Fam19a1	Cd209a	Ube3a
Osbpl3	Arid3b	Rbm3		Sptbn1	Fasn	Skil
Nipa1	Crabp2	Maf1		Plekha1	Clec4a2	Glrx5
Vps37a	Htatip2	Gm23910		H2-Q5	Xylt1	Sipa1
Dhx58	Hcfc2	Arl8b		Gm26797	Glmp	Foxo1
Rabep2	Ajuba	Ibtk		Il18bp	Tmem8c	Stag1
Zfp758	Arrdc3	Mepce		Mrgpre	AF529169	Arhgap12
Vac14	Sox4	Znrf2		Ubac2	Dcstamp
Bbs9	Smg6	Zfp959		Gm15880	Dna2
Gpr132	Sord	Sec22b		Pdcd6ip	Akr1a1
Sh3kbp1	Gm4149	Cdc42ep3		Hes7	Tspo
Cdkn1b	Mgll	Dhx57		Gm38158	Arpc1b
Pydc3	Drap1	Rnase12		Kif1a	Lox
Uba7	A930011G23Rik	Gbp3		mt-Tl1	C030034L19Rik
Wapl	Ndufc1	Ccr1		Csk	Gm15753
Scaf11	Nars	Ogg1		Plekha2	Ifngr1
Gm43331	Gm43481	Hn1		Xaf1	Maf
Nolc1	Galk2	C030013D06Rik		Tnfrsf13b	Akap1
Nfrkb	Topors	Col25a1		Hps3	RP24-163M14.3
Gm6583	Ltbp3	Sgtb		4931406P16Rik	Cyb5r3
Ttc32	Mcee	Gm12163		Ubl3	Tpx2
Scaper	Reps2	RP23-323L3.1		Adgre1	Pnpla7
Cenpn	Tbc1d14	Ginm1		Taz	Scd2
Nop56	Sirt7	Pafah2		Nap1l1	Spc25
Grwd1	Dpm3	Pitpnm2		mt-Tp	Slc25a25
Slc35a3	Mid1	Arl4d		Gm13889	Itga5
Fam220a	Calcrl	Apobec1		Robo2	Hs3st1
Srsf10	Cebpz	Stat6		Nampt	Lat2
Vps16	Hsbp1	Wdr4		Cpeb2	Pwwp2a
Abca3	S100a11	Nat2		Cd82	Efr3b
Cep250	2610524H06Rik	Exo5		Ly6g6e	H2-Q6
Sema4d	Star	Trappc5		Cnot8	Cenpa
Adsl	Mettl4	Abhd14a		Rpl3-ps1	Cxcr4
Krt80	Fam129a	Cxcl2		Clec1b	Commd8
Mapk8	Rilpl2	RP24-225A21.2		Bid	Eprs
Spen	Vps9d1	Ttc9		Slc38a6	Plk1
Gpsm2	Hlf	Snord35a		Map7	Atp6ap1
Lars	Pole4	Tlk1		Cdk5r1	Ccnf
Peak1	Tmem64	Hdac2		Stard3nl	Txnip
Klhl35	Myo1b	Stpg1		Slc38a1	Atp6v1c1
N4bp2l1	Mrpl52	Mefv		Tfe3	Ldlrad3
Troap	Gm10118	Bag5		1810043H04Rik	Gars
Marf1	Sdhb	Fkbp6		Emc4	Cdkn2c
Fbxo11	Elavl4	7330423F06Rik		Slc38a9	Pnrc2
Atrx	Eps8	Dgki		Bend5	Fn1
Spaca6	Cox7a2l	H2-K2		Clec4a3	Lsm4
Mapk7	Park7	Trim30a		Med8	Srsf5
Mybbp1a	Guca1a	Gm26930		C87436	Rpl4
Lman2	Cdc5l	Nup214		Ipo5	Siglec1
Arhgap19	Sumo3	Synpo		Tpm3	Gapdh
Coro7	Rhbdl3	Spryd4		Mcam	Gtf3c4
Fbxw7	Chchd2	Rnf20		Slc25a43	Shisa5
2010315B03Rik	Vsir	4930402H24Rik		Pla2g4a	Cdk1
Aacs	Gbe1	Ccdc71l		Pias3	Tm6sf1
Laptm5	Fry	Gm11185		Runx2	Gm11545
Clec4a1	Slc35g2	Ganab		Tab2	Phf11b
Aco2	Dctn3	Cfap61		Icosl	Sh3bgrl
Mbd3	Ube2m	Psen2		Cd300a	Ddx31
Glul	Crebzf	Cdkl2		Lmna	Tmem160
Ddx54	Ghr	Neo1		Tnfrsf11b	Oxct1
Mbip	Polr2g	mt-Ta		Tmem151a	Pde8b
Madcam1	Ldlrad4	Agmo		Ndc1	Ccdc86
Zfp169	0610030E20Rik	Tm9sf4		Cdca4	Galc
Pde7b	Gm43010	Lcp2		Ddx26b	Bambi
Gm42515	Ndufa12	Tmco1		Btla	Gm15156
Nup210	Prdx5	Tor1aip1		Hmox1	Tmem178
Tiam1	Rnaset2b	Rpl36a-ps2		Wdr20	Fgr
Lsg1	Atp5k	Gm7507		Rps16-ps2	Rpl32
Sltm	Atp5a1	Ung		Gm37783	Arnt2
Pycard	Exog	Mcm3ap		Grrp1	Gm4951
Wdr62	Ets2	Gm15846		Slc2a3	Aurkb
Cfap43	Tbca	Gm43751		Vcl	Cyba
Zfp236	Rassf1	Gm9958		Apoc1	Asf1b
Scarf2	Zfp229	Lamtor3		Marveld1	Cacna1a
Psmd14	Cfap74	Gatm		AW209491	Zfhx3
Gm44144	Pfn1	Tmem86a		Brd2	Oas3
Bend4	Zmym6	Ccdc174		Usp30	Abcd2
Cln3	Nhsl2	Alox15		Tep1	Cndp2
Tm2d1	Sdccag3	Trim59		Setd3	Itgb5
Csnk2a1	Efnb1	Grb2		Gm8606	Trpc4
Rab1a	Nucb2	Rny3		Nxt2	Slc1a5
Psma1	Gm43065	Gm37805		Rnpc3	Prnp
Sf3b2	Ndufa4	2310034O05Rik		Gm14508	Tmem184b
Gm38111	Galnt9	Gm2467		Tpbgl	Cd63-ps
Bub1	Mrpl27	Vasp		RP23-247P3.2	Socs2
Flii	Spryd7	Zwilch		Ltb	Serpinb1c
Ska1	Pisd-ps1	2011-09-01		Mtmr10	Klf3
Ncdn	Zbtb1	Runx2os2		Tiprl	Rps19
Foxm1	Armt1	Bud13		A130014A01Rik	Rtcb
Ctsf	Gm28035	Commd3		Caml	Amdhd2
Gm43185	Ly86	Pigt		Ulk2	Ogfr
1810022K09Rik	Ccdc88b	Slc45a4		Atp6v0d2	Vrk2
Ric3	Ccdc117	Bloc1s4			Cytip
Ampd2	Grk6	Gm23153			Galns
Insr	Gtf2h5	Serac1			Haao
Ptprs	Wdr83os	Pear1			Pip4k2a
Wtap	Il17ra	Gm24514			Enpp1
Esyt1	Sod2	Zdhhc14			Col27a1
Fgf11	Mpc1	Dync1li1			C1qb
Hook3	BC031181	2810001G20Rik			Tuba1a
Nol6	Lamtor2	Dhcr24			Gimap6
Gpaa1	Arl2bp	Exosc3			Cd5
Anp32e	Phf6	Lpxn			Kif20a
Zdhhc20	Evl	Tubb2b			Racgap1
Tlr12	Polr2f	Bbof1			Tmed3
Faap100	Slc26a2	Canx			Timeless
Tnip2	Tmsb10	2310043P16Rik			Fam105a
Atp13a2	Rassf5	Zfp280b			Pmp22
Mogs	Zfp37	D17Wsu92e			Sh3pxd2b
Ap1s2	Ap2s1	Thap1			Maged1
Lsm14b	0610012G03Rik	Gm36211			Clip1
4930453N24Rik	Prdx2	Rims2			Tbc1d8
Gm37876	Ndufa5	Gm43810			Acsl5
Gm15706	Tbc1d25	Rnf207			Ctnna3
Tmem87a	1110008P14Rik	Cyth2			Bcl2
Nop2	Zfp273	Dynll1			Ctse
Cpne2	Ctnnal1	Atp11c			H2-M3
Hnrnpa0	Zfp335	Zfp770			Colgalt1
Phf14	Nudt14	Slc36a1			Emc10
Paip2	C1qa	Slk			Dapp1
Ckap2	Tmc7	Rtca			Elovl7
Rnf181	Spcs1	Ankrd33b			Insig1
Shmt2	Pkp4	Nudt7			Lrmp
5031434O11Rik	Tlr1	Ptdss1			Tmem51
Sec31b	Relt	Gm16071			Tmbim1
Med1	C1galt1c1	Zfp541			Gnptg
2810403D21Rik	Themis2	Marc2			Ogfod3
Memo1	Bphl	Bin1			Mvp
Vipr1	Gm8817	Neat1			AI607873
Rb1cc1	Trp53bp1	Txndc9			Slc45a3
Lrrfip1	Rragc	Rab3d			Gde1
Ap2a1	Ndufa8	Sdk1			Fgf1
Polr3d	Elovl1	Mex3b			Calm3
Gm37787	Ppid	Chaf1b			Rftn1
Chordc1	Sec61b	Pdgfc			Tgm2
Gpr141	Ccdc91	RP23-74O12.7			Cited4
4930404N11Rik	Srsf7	Depdc1b			Txndc16
Fus	Psmb4	Tk2			Il12rb2
Pyhin1	Eif3h	Zfp61			Gla
Itch	Akap8l	Zdhhc2			Ptprc
Aldh7a1	Rnf111	Dag1			Cmtm3
Zc3h15	Mtmr11	Marveld2			Lag3
Ctbp1	Txndc17	Eif4a3			Cpq
Vps33a	Gm10728	Iffo1			Actn1
Pold1	Ndufb10	Homez			E2f1
4930579G24Rik	Gadd45a	Fndc3a			Etv4
Rnf40	Aftph	Casc4			Camk2n1
Dnajc18	Porcn	4930440C22Rik			Man1c1
Arntl	Rgmb	Pomc			Ccl5
Rsu1	Vcpip1	Ubap2			Sag
Haus4	Golm1	S100a10			Zfp866
Socs4	Rpl13	Gm8495			Atp10a
Pepd	Srrd	Gm10916			Nrp2
Tbc1d20	Stau1	BC002059			Ctla2a
Tcf3	Suv420h1	Gm10863			Slc2a1
Prdm2	Usmg5	Coa4			Zbp1
Gm38248	D230017M19Rik	Ubald1			Dkk2
Fgfbp3	Cul1	Pnpo			P2ry13
Fam20b	Jak1	Slc28a2			Psme1
Gm44045	Pias1	Rpusd4			Nrp1
Tyw1	Gm43343	Csnk1g2			Speg
G3bp1	Tada2b	2010300C02Rik			Klrb1a
Rnf10	Foxn3	Cers6			Plin2
Mcrs1	Sgce	Tmem185b			St8sia6
Sf3b6	Mkl1	Mrpl44			Slc16a8
Ptbp3	Gab1	Zfp563			Hcar2
Frrs1	9530068E07Rik	Mrps22			Arhgap24
Rlim	Higd2a	Rad51ap1			Mfsd1
N4bp2	Cd180	Limd2			Mylip
Suox	Ethe1	Fam167a			Pnp
Tmem42	Stx5a	Gm12164			Sqle
Ndst1	Iws1	Gm9929			Tspan18
Pcif1	Gm19409	Usp9x			Gpnmb
Trpc4ap	Tnni2	Gm37588			S100a1
Gm20045	Itgae	Pdcd7			Gimap9
A930024N18Rik	Pnmt	Tmem37			Tuba1c
Wdr18	Arl3	Gm21984			Shcbp1
Vps41	Ctdnep1	Hagh			Antxr2
Gm44860	Arhgap30	Nop58			Cd200r4
Klrk1	Dhx30	Pick1			Renbp
Nr3c1	Pde3b	B3galt2			Tcf4
Gm37613	Fxyd2	Gdi2			Usp12
Klhl25	Klc1	Gm26740			C2
Taf12	Zbtb48	Cdca7l			Fcgr4
Gm44694	Tnfsf13b	Irf1			Phf11a
Gm37874	Actr1a	Gstk1			Ifi44
Acin1	Fam195a	Ahnak2			Arrdc4
Dcp2	Slc12a6	Junb			Tmem205
Aspscr1	Hyal3	Thtpa			Gm45153
4930599N23Rik	Pla2g12a	4931431B13Rik			Arhgap26
Xbp1	Calhm2	Vps72			Ifit2
Lrrc59	Mdm2	Snapc2			Adamts1
Gm24601	Ptpmt1	Nipsnap3b			Itm2b
Rpl12	Gm11827	Acat1			Haus8
Rnd3	Tmem63a	Tmem191c			Hcst
Syngr2	Sub1	Pigyl			Mnda
Kmt2e	Gm15635	Nox1			Msmo1
Dcaf11	Sugp2	Hist1h4h			Prkar1a
Dgat1	Dnajc15	Hist1h3f			Gng12
Snrnp48	Herc3	Mettl18			Gpr84
Ezr	Cd300lb	Gpr157			Ctss
Lias	Kif5b	Polr2h			S1pr1
Rnmtl1	Dnajb5	Kdelr3			Mef2a
Dnaja1	Rab11fip5	B230377A18Rik			Cenpe
Gm43915	Anks6	Gm9794			Calr
Vbp1	Meis3	Zcchc2			Cpeb1
9030624J02Rik	Copz2	Adamts7			2810474O19Rik
Arid3a	Tpcn1	Tctn3			Syt11
Ifi30	Tmem258	Dck			Rxfp1
Gm43857	Tnfrsf21	Gm26457			Prdx6
Ccdc59	Vti1b	Rgs16			Ntpcr
Slc31a1	Npm1	Myl12b			Hvcn1
Pwp2	Rps7	Slc25a12			Zbtb16
Ipo4	Pik3r5	Tmem140			Gm37168
Arl6ip5	Gm7118	Zfp106			H2-Oa
Mdfi	Fdx1l	Gm44620			Optn
Stap1	Ago2	Micu1			Tmem189
Rnf41	Dhx38	Trpm7			Rgs19
Atg2a	Atf7ip	Rfwd2			Cd34
Txndc5	Lamtor5	Cdc40			Prkca
Spg7	Mynn	Gm37313			Nes
C530008M17Rik	B3galnt2	Dolk			Dok3
Frmd8	Myo18b	Stim2			Serpinf1
Cd2ap	Elof1	Entpd5			Itm2c
Ftl1-ps2	Rcsd1	Nat8l			Rsad2
Zfp329	Map4k5	Psrc1			Peli1
Zfp943	Ppp3ca	Thumpd3			Wbp5
Cdkn3	Ip6k1	Gm11223			Fam49b
Ino80	Slmap	Rbms2			Ccng2
Snx16	Oxnad1	Gm43597			Ngfrap1
Carf	Abhd17a	Fam168b			Rpl14
Dnajc27	Plb1	Mansc1			Cox6a1
Arhgap5	Tnrc6b	Rpl10			Pdlim4
Ascc3	Zmym2	AI467606			Rps5
Ube2a	Pcna	Srsf3			Zfp644
Psmd2	Lpin2	Smu1			Atox1
Mfsd5	Cbx7	Atg7			Tppp
Cdc45	Btbd10	Hmgcr			Itgal
Med31	Slc9a9	Mrps31			Rtp4
Gm43213	Eml6	Gm7456			Plxna2
Rasa3	2810468N07Rik	Gba2			Fam64a
Msl1	Rffl	2810021J22Rik			Plpp1
Ccser2	Pygm	Naprt			Slc23a2
Ppan	Apmap	Gm29596			Susd1
Pfkfb3	Hpf1	Eif1			Bsg
Ighm	Plscr1	Lamc1			Alox5ap
Tmc6	Ppib	Zscan20			Adrb2
Gm44891	Rfc1	2310040G24Rik			Ppt1
Tmem243	Pnpla3	4930430E12Rik			Tlr2
Dgka	Wdfy2	Gm20636			Tmem123
Rbbp4	Tgfb2	Nip7			Usp18
Pfas	Tmem50a	Ier5			Uck2
Zfp160	Cd300c2	Katnal2			Mpi
Gak	Mdfic	Hyi			Abhd12
Slfn1	Zfp715	Ids			Plekhh2
Eed	Mycbp2	Gm42670			St3gal5
Ppp1cb	Sp4	Gm38250			Fkbp2
Slc25a36	Bola2	Wdr92			Tap1
Nde1	Gna11	Zc3hav1			Efemp2
Mir99ahg	Csad	Trim47			Bri3bp
Gm42867	C230096K16Rik	Osgep			Ggh
Pik3r2	Nsmce2	Tex2			Rragd
Tmf1	Lrrtm3	AC124457.1			Rps2
Il18	Sgcb	Gm5430			Stxbp2
Zfp384	Shd	Gm12708			Cyp51
Luc7l2	Mertk	Rpl28-ps1			Lyzl4
Dgkq	Gm13209	Gm43951			A430093F15Rik
Uba3	Slc39a12	Taf8			Gm17039
Anxa6	Mical3	Dcun1d4			Smc4
Ppp1r13b	Top3a	Ctnnb1			Glipr1
Mrps6	Bcl2l11	Gm13830			Stat1
Rasa1	Gstp2	Kif1b			Masp1
Khk	2015-09-01	Taf7			Cd44
Xpo6	Dennd1c	Acadm			Adam9
Gpx1	Gm7765	Olfr112			H2-T23
Tbck	Sf3b1	Sapcd2			Gm26714
Gm12940	Gm42848	C330018A13Rik			Lpar6
Prodh	Gm29781	Mib1			Atp6v0e
Wwp2	Gm43144	Smug1			Rps15
Clk4	Erp29	Nln			Plxnd1
Ing2	Dgcr6	Gm26456			Irf7
March6	Gm29170	Sfr1			Nfat5
Erf	Itgav	Hyal1			Ptafr
Oip5	Pald1	Gm7972			Phlda1
Tmem19	Sypl2	Gm16907			B2m
Cops7a	Lrrc29	Pop7			Rhoh
Ednrb	Slc39a2	Cdip1			Tmem204
Gins2	Gm2065	Parp14			Sqrdl
Mbtps2	Sp3os	H2-T10			Slc40a1
Ddx39	Mboat1	Gm37566			Rps9
Malsu1	Rasgrf1	4632404H12Rik			Gnptab
Psma3	Fbxl20	Josd1			Tmem128
Fam208a	1700030J22Rik	1810009A15Rik			Trp53i11
Mier3	Btf3	Osbpl8			Col9a2
E330011M16Rik	Pla2g15	Vps13b			Plp2
Uhrf1bp1	Athl1	Gm28438			Crlf3
Gm11653	Ankrd44	Twsg1			Kif11
E2f3	St7	Lonrf3			Ptpra
Hbegf	Abcc3	Gm1647			Neil3
Wdr82	Ano6	Tcf24			Ndufa1
Gnb5	Nbeal2	Fam122a			Golph3l
Net1	Evi2a	RP23-58C12.2			Ndufa13
Gm27010	Rab33b	Elf2			Slc9a8
Phgdh	Zfp68	Rnf130			3110082I17Rik
Mr1	Eif2s3y	Uhmk1			Prpsap2
Cnpy3	Luc7l	Fam73a			Eef1a1
Bmpr1a	Bax	Gm14221			Cstb
Cops5	Morc3	Atxn1			Tmem119
Rnf31	Mmp28	Rhov			Rpl18a
Rad23b	Yipf1	Cbr4			Slc37a2
Chd5	Ephb3	Gm16302			Plcl2
8030462N17Rik	Sptssa	Sdhaf1			Il1b
Gm44567	Ost4	Ncl			Cmtm7
1110002J07Rik	Dusp27	Tet2			Sc5d
Traf3ip3	AU020206	Pde10a			Adcy3
E330020D12Rik	Becn1	Gm44175			Gm42602
Gtf3c1	Tubgcp5	Asap1			Cep68
Ppp1r9a	Tnfaip3	Map2k4			Snn
Ptpn21	Gcnt7	Mx1			Mrpl54
Timm50	BC022960	Gm37850			Rnf139
Wbp4	Klhdc8b	Gm36930			Atp6v0c
Cep41	Rpl3	Arfgef2			Uba52
Ankrd39	Arl5c	Tmem107			Tmem173
Slc3a2	March2	Glo1			0610040J01Rik
Ddx17	Mbnl2	Lrp4			Rpl41
Slc39a11	Fam78b	2900076A07Rik			Ndc80
Cspp1	Psmb7	Spag7			Fis1
Gm42490	Fbrsl1	Pvt1			Clptm1l
Dock10	Syne2	Pqbp1			Slc16a1
Loxl3	BC004004	Gm38134			Ceacam1
Dlc1	Eid1	Folr1			Neu1
Irf2bp2	Foxj2	Atg16l2			Mrc2
Rab11fip4	Tspan7	Atp8b5			Capn1
Hist1h1b	Nup107	Tanc1			Gdi1
Alox5	Yif1a	Mdm1			Rasl11a
Gm37519	Txlna	Rhob			Borcs6
Gm44704	H3f3b	Gm13543			Synj2
Tango2	Gm29096	Psmd12			Pebp1
Hivep3	Ctnna1	Slc26a6			Slc16a3
RP23-321G17.9	Ascl4	Mis12			Qdpr
Sun2	Ctnnd2	Hexim1			Fam72a
Fxr1	Arsk	Igfbp4			Bank1
Crk	Lysmd3	Sdccag8			Dnase2a
Mir6236	Prim2	Gm44243			Oard1
Ranbp3	Cep85	Kif27			Eif3k
Cdk8	Rps4x	Sel1l3			Tnfaip8
Gm23935	Hist1h1c	Pithd1			Phf11d
Cmah	Mrpl30	Csde1			Tmem144
Mbp	Cdc37	Rpp14			Perp
Nlrx1	Maml3	Lama3			E430025E21Rik
Nphp4	Ptms	Csnk1e			Dctn5
Clptm1	Hmgn1	Gm14425			Npnt
Vwf	Zmynd11	Gm4117			Rtn1
9930021J03Rik	Gm15982	RP23-425N12.2			Upk1b
Ddx56	Gm43693	Arhgap11a			Gm1966
Alg1	Duoxa1	RP23-167I14.1			Abcf2
Nlrc4	Syt3	Lrrc75a			AY512915
Gm42463	Chmp4b	0610009B22Rik			Nup88
Vcam1	Gfap	Kif20b			Tcap
Slc20a1	Fblim1	Phf19			Yipf7
Fubp1	Zfand2a	Corin			Rplp1
Gm37474	Vav1	Hist3h2a			Srgap2
Erbin	Parvb	Esrra			Arhgef10l
Unc93b1	Spns3	Tssc4			Gm37494
Rtn3	Rap2b	Pdcl			Susd3
Cd302	Lrrtm2	H3f3a			Fam110a
Gm44428	Preb	Gm12504			Rps14
Stk11ip	Abcb4	Olfml3			Fam45a
Pggt1b	Scand1	Itga6			Sall1
Cactin	Cdc42ep2	Shisa7			Rhoc
Mob4	Gm45203	Sh2b2			Cux1
Nit1	Dusp7	Pcdh1			Gm15283
Hsf2	Mif4gd	Gnb3			Nenf
Tbl1xr1	Gm44597	Cd55			Rpl38
Pdia6	Dcaf17	Gm43668			Csrp1
Ifrd2	Sparcl1	Chpt1			4833407H14Rik
Hykk	4930581F22Rik	Sntg2			mt-Nd2
Ube2k	Vprbp	Kat6b			Rnf146
Ssb	Zfp646	Cdc6			Mtus1
Lyrm2	Psmb9	Exosc1			Pqlc1
Gm44630	Tspyl1	Ddah1			Serinc3
Sugt1	Atp10d	Sec63			Rpl8
Nsun2	Ghitm	Plvap			Lyn
Sfxn3	Syt8	5330417C22Rik			Fgf13
Nkiras2	Vangl1	Snrnp27			Pgk1
Hps5	S100a13	Frmd5			Ptger3
H2-DMb1	Foxj3	Snora33			Prkcd
2810405F17Rik	Ndufs5	Pkia			4930556M19Rik
Gm16617	Gapvd1	Rab3a			Tgtp2
Nr6a1os	Psmb2	4930589L23Rik			Fer
Ttc9c	Kat5	Ccdc112			4833439L19Rik
Ahsa2	Ccdc28b	Fbxo22			Oas2
A130048G24Rik	Gm28370	Zfp455			Ggta1
Gm38366	Ncapg	Pparg			Tmem52
Slamf8	Pon3	Nudt6			Inf2
Wipf2	Pbdc1	Alms1			Pcp4
Itgb7	Akap8	Cyp2j6			Ptpn7
Gm44291	Mapk1ip1l	Gm13212			Nab2
Dhx9	Golga1	Eif2ak4			Nfkbiz
Phrf1	Ndufs8	Ccdc71
Zfp125	Prkcb	Usp3
Rab14	Gmpr2	1700084C06Rik
Fam161a	Zfp128	Npat
Fanca	Fam208b	Tmx2
Bap1	Lrwd1	Ap3m2
Wee1	St7l	RP23-410L16.8
Def6	5031414D18Rik	Ralb
Taldo1	Celf1	3300005D01Rik
Dbnl	Ube2l3	Gm37436
Fam173b	Trmt2b	Rmnd5b
Tubgcp6	Hectd3	Serpina3f
Gnpda1	Cd59a	Pik3cb
Ano7	Prpf18	Tinf2
Dram1	Fuca2	Eif4g1
2002-09-01	Prpf3	Fam132b
Ptpro	Slamf6	Tiparp
1110059G10Rik	Col6a3	Kcnma1
Pif1	Brd9	Dnm3
Daglb	Mtfr1l	Dgcr8
Amn1	Slc6a9
Sae1	Nisch
Mms22l	Lgals4
Akt1	Cfb
Mettl5	Nop16
5730507A11Rik	Gm10524
Mcmdc2	Thap3
Ankrd46	Cnot3
Atad2b	Mkln1
E2f7	Gpatch8
P4ha1	Plekhg5
Xkr5	Lbr
Paqr4	Mir17hg
Hgsnat	Usp6nl
Prim1	Slc13a2
Gys1	Itpr3
Gm43766	Ppp1ca
Gm43660	1810058I24Rik
Gm38317	Patl2
Aldh3a2	Aurkaip1
Ecm1	Fli1
Gm35339	Numa1
Aldh3b1	Rps8
Rpl6	Hars2
Slc25a22	Acad11
9430025C20Rik	Cln6
Cables1	Abcb8
Srp19	Dbt
Paqr7	RP23-187B11.6
Rasgrp1	Rnf167
Ralgds	Acot9
Gm38273	Cdyl2
Cyp2d22	Ccl12
2510002D24Rik	RP23-57D10.3
Dpp9	Supt20
Gm2245	Rcn3
Snhg15	Zfp324
Bop1	Gm27008
Zswim1	Apoc4
Pigk	BC026585
Samd9l	Ssh2
Cpsf7	Gnb1
Exosc10	Samsn1
Far1	AI413582
Zfp655	Gsg2
Il4ra	Zfp85
Acly	Zfp212
Bola1	Abcc4
Rrs1	Gm34280
Jmjd1c	Znhit1
Pcyt2	Pde2a
Slc39a10	Dll1
Dnaaf3	Gm37728
Furin	Napepld
Slc20a2	Baz2b
Tmem126a	Dynlrb1
2510017J16Rik	Dynlt3
Zfp213	Sbds
Abcb9	Fzd9
Csf1r	Il21r
Brat1	Garnl3
Gm26623	Tmem219
Pacsin2	Rlf
Gm16185	Cyb561d1
Gm11837	Cenpt
Agtrap	Herc4
Mgat4b	Hmg20a
Surf6	Crot
4930486L24Rik	Gm12000
Gm38104	Ccdc92
Zfp560	A930007I19Rik
Traf1	Esd
Wbscr27	Ptma
C1qtnf3	Siae
Sepw1	Pgam1
Rad50	Slc50a1
Eif2b5	Safb
Skiv2l	Zfp958
Prkdc	Atp6v0e2
Car9	Krtcap2
Gm37968	Mpv17l
Acsl3	Zfp963
Enpp6	Slc13a3
Prr11	Mfng
Pbx1	Stx1a
RP23-480D17.3	Lrp12
Fbxo28	Rpsa
Gm42578	Slc36a4
Ufd1l	Siva1
Gm43560	2810403A07Rik
Gm13920	Efcab6
Pde4a	Lck
Tmem39b	Thoc7
Dut	Hk1
Mrpl12	4930481B07Rik
Gm16337	Ppp6r3
Pbx2	Pp2d1
Kcnh6	Lmo2
Gm38214	Pno1
D2Wsu81e	Mier2
Spn	Ndufb5
Fn3krp	Nans
Uhrf1bp1l	Zfp606
Ccdc50	Nf1
Gabpb2	Atp5g3
Bnip3l	Mpv17l2
Gm13423	Acp6
RP23-322E23.4	AB124611
Alg13	Sertad2
Gm37666	Sfswap
Tal1	Adgrl2
Enpp5	Pgd
B230219D22Rik	H2-T24
Enoph1	Rnh1
Mfsd3	Fam221b
Zfp639	Pik3r6
Minpp1	Cacnb2
RP24-464B16.1	Spg21
Zfp799	Acrbp
Gm14964	Aldh1a3
Gm37979	Pou2f1
Gm29650	Ube2j1
Anapc10	Kcnc2
Kpna6	Efnb2
Snapc5	Cep72
Angel1	Tet3
Cp	Cox5a
Cenpk	Tmem135
Arhgap15	Naa30
Rsf1	Asxl1
Rbm6	Abhd18
Hccs	Mrpl20
Ptpa	Mrpl17
Hhex	Rnf187
Ldlrap1	Zfp458
Angel2	Papln
Zbtb7b	Zbtb41
Ddrgk1	Zfyve28
Rgp1	Usp42
Chrnb2	Slc46a3
Pin1	Yes1
Uba1	Casc3
Bzrap1	Gsdmc4
Gm5970	Adam10
Nat10	Zbtb37
Pilrb1	Anks1
Ms4a4c	Hist1h2be
Enc1	Kdm5a
Ap2m1	Zfp658
Fam69a	Rpl35a
Ppp1r16a	Crkl
A530017D24Rik	Coro2a
Purg	Stra13
Ankrd17	Gm16183
Aldh1l1	Rps10
Hivep1	Phpt1
Ifrd1	Rnf2
Zfp207	Itpr2
Cep128	Fmnl3
Dhrs13	Usp16
Nelfe	Eme2
Pcbp2	Gna13
Fbxw17	Suclg2
Plpp3	Tmem192
Aldh16a1	Cyth4
Phf10	Taf10
Mrpl24	Amigo1
Tmc8	Snap23
Gm45220	Atp6v0b
Ifi35	Bcl9l
Nktr	Zfp60
Ncoa7	H1f0
Gm15971	Mrps24
Acss1	Ndufa6
Lonp1	Kctd2
Prcp	Ptgfrn
Nr1h3	Egr1
Dexi	Acer3
Mgrn1	BC017643
Clcn4	Fhl3
Ncln	Cttnbp2nl
Gm20342	Fam185a
Wipf1	Asb3
4933431G14Rik	A930018M24Rik
Ddr1	Zc3hav1l
Sfxn1	Ier5l
Eif3d	Kpna1
Mbtps1	Gm15427
Srsf6	Dip2b
Vamp2	BC005624
Rere	Chad
Ect2	Smcr8
Spns1	Lrig2
Fbxo31	Smim11
Pusl1	Tslp
Itga4	Thbs2
Mmp13	Smim19
9530003O04Rik	Gm5652
Pank1	Bnip3
4833445I07Rik	Srsf4
Gm36266	Dagla
Gm34780	Srl
C1galt1	Wdr43
Cry2	Umad1
Clec5a	Smg8
Rbm39	Tor4a
Zbtb4	Tmem170
Gm37730	Zfp846
Trp53inp2	Pik3ap1
Gm10605	Letm2
Dcps	Tada3
Serpinf2	Slc25a38
Ift122	Rhof
Hdgfrp3	Pdgfa
Slc6a6	Wdr37
Ints1	Zgrf1
Rpain	Snx29
Gm42879	Ccr1l1
Mbtd1	Necap2
Ube2g1	Aprt
Wdr81	Csnk1g1
Kcmf1	Rab1b
Gm43658	Gm43336
Gm17066	Trim2
Map3k11	Tmem55b
Gm15567	Hint2
1110002L01Rik	Ltc4s
Setx	Paqr8
Fam168a	Rbm4b
Larp1	Vps26a
Pafah1b2	Ak2
Laptm4a	Prdm9
Cpsf6	Hs3st2
Dusp6	Zfp868
Cyb5a	Pink1
Fbxw5	Dpf2
BC037034	Ankrd11
Nrd1	Asb1
Plekhg3	Bik
Wdr60	Gm44901
Ccdc124	Traf6
Taok2	Heca
Chic2	Zmiz1
Cbwd1	Mapk12
Pmf1	1700037H04Rik
Birc6	Zfp398
Rab21	Pde4dip
Nuak1	Gm44777
D1Ertd622e	Gm10548
Gm29488	Treml2
Kcnq1ot1	Tlr3
Tbc1d22a	Med20
Irak1	Pde1b
4732440D04Rik	Sall3
Dnmt1	Hsf2bp
Gm38262	Chchd1
Thbd	Zfp266
Btbd18	Gm10655
Amhr2	Cdca7
S100pbp	Pon2
Sgk3	Pmvk
Map3k6	Osbpl11
Rps6ka3	Rps10-ps1
Gabrb1	Zfp362
Gm8378	Fbxl12
Btd	Lrch1
Slx4	C1qbp
Gm26891	Arpc3
Tmco3	Brk1
Srrm1	Gm8774
Naa25	Gm15445
Syncrip	Notch4
Gm17201	Lrrc24
Slc52a2	Sys1
Zfp780b	Scaf4
Gm14286	Stat5b
Cecr5	Zfp551
Ptpn12	Jarid2
Sec11a	R3hdm4
Tlk2	Prkaa1
Gm16286	Ankrd10
Mag	Gm16001
Gm42549	Bach2it1
Trmo	Bag3
Gm36638	Soga1
Pole	Inpp5e
Gm16300	Cluh
Fam126b	Zfp354c
Trmt1l	Slc43a1
Fam167b	Lrrc16a
Clec9a	Rfwd3
Pml	Myadm
Psmc6	Atmin
Gm20517	Prr14
Atg3	Hs6st1
1700020I14Rik	Zfp809
Irf9	Kdsr
Smap1	Rbm15b
Aip	Abcf3
Derl2	Anp32b
Nek3	Atp5h
Chd8	Gm28373
Trip11	Gm45120
Sirt6	Gm16278
Bloc1s1	Capns1
Cnih4	Malt1
	Blcap
	Tbl1x
	Degs2
	Fam114a2
	Zfp518a
	Rab19
	Atp2a3
	Atf2
	Cops6
	Mkrn1
	Stxbp1
	Spint1
	Pdcd6
	Secisbp2l
	Ict1os
	Pdia3
	Ndrg2
	B130055M24Rik
	Zmym1
	Etnk2
	Atp8b2
	Tmem168
	Mark2
	Mut
	Ero1l
	Gm37166
	Atxn7l3
	Ssr2
	Syt12
	Frmpd4
	Rpl30
	Cdo1
	Pdpr
	Rab8a
	Zfp174
	RP23-321G17.10
	Trap1
	Zfp553
	Vps51
	Atraid
	Gm10250
	Hivep2
	Fndc7
	Sh3gl1
	C530005A16Rik
	Creg2
	Tspan9
	Slc8b1
	Gm26722
	Rpl14-ps1
	Ssbp1
	1700010I14Rik
	AV039307
	Nagk
	Gm44065
	Nt5c3b
	Gm12195
	Ppox
	Fam3c
	RP24-225A21.3
	Pfdn1
	Jund
	Pemt
	Gm37788
	Il1r2
	Atpif1
	Tmem9
	Tceal8
	Sdhd
	Zfp874a
	Snrpd3
	Uspl1
	Fam3a
	Hdac10
	Klhl42
	Ppp3cc
	BC048403
	Slc36a2
	Cisd3
	Aldoc
	Gm9999
	Tex261
	Zfp810
	Haus2
	RP23-383A10.1
	Psmb3
	Plcd4
	Eif4a2
	Dbndd2
	Eea1
	Inpp5f
	Gpatch1
	Galnt4
	Arnt
	Ikzf1
	Jph3
	Slc16a10
	Arl16
	Prpf31
	Nudt3
	Gm44509
	Rexo2
	Tctex1d2
	Zc3h11a
	Plcg1
	Tug1
	Macf1
	Kdm2b
	Fam71e1
	Prickle1
	Morf4l2
	Map1s
	Gm37978
	RP23-389N20.2
	Nipal3
	Kctd21
	Rpl31-ps8
	Fbxl4
	Patz1
	2610008E11Rik
	Zfp120
	Mtrr
	Loxl4
	Gm16192
	Gm37248
	Zfp59
	Gpc2
	Bcl9
	Gm15246
	Zfp879
	A130010J15Rik
	Wac
	Gm26789
	Mrto4
	Rbm15
	Dazap2
	Fam129c
	Cyp4v3
	Nacad
	Ngrn
	Samhd1
	Heatr3
	A830008E24Rik
	Mib2
	Elac2
	Bag4
	Lin54
	Hsdl2
	Dst
	Gm37954
	C130023A14Rik
	Zfp748
	Tlr4
	M6pr
	Zscan18
	Mbd2
	Ppara
	Eepd1
	Hnrnpll
	Aars2
	Eif5a2
	Prelid2
	Cnrip1
	Dnajc7
	1500015A07Rik
	Yjefn3
	Mphosph9
	Mat2a
	N6amt1
	Abca9
	Fmn1
	Edrf1
	Dpy19l1
	Hspa13
	Dync2li1
	Rbl1
	Pcyox1
	Erlec1
	Prr3
